# Supplementary material for: Automatic selection of representative proteins for bacterial phylogeny
Source: PubMed Central journal article supplement (PMC1175084; doi:10.1186/1471-2148-5-34), 2005-05-31
Supplement: 1471-2148-5-34-S1.pdf [file 1471-2148-5-34-S1.pdf]

# **Automatic selection of representative proteins for bacterial phylogeny – supplementary material**

Marshall Bern\*<sup>1</sup> and David Goldberg<sup>1</sup>

<sup>1</sup>Palo Alto Research Center, 3333 Coyote Hill Road, Palo Alto, CA 94304, USA

Email: Marshall Bern\* - [bern@parc.com](mailto:bern@parc.com); [goldberg@parc.com](mailto:goldberg@parc.com);

\*Corresponding author

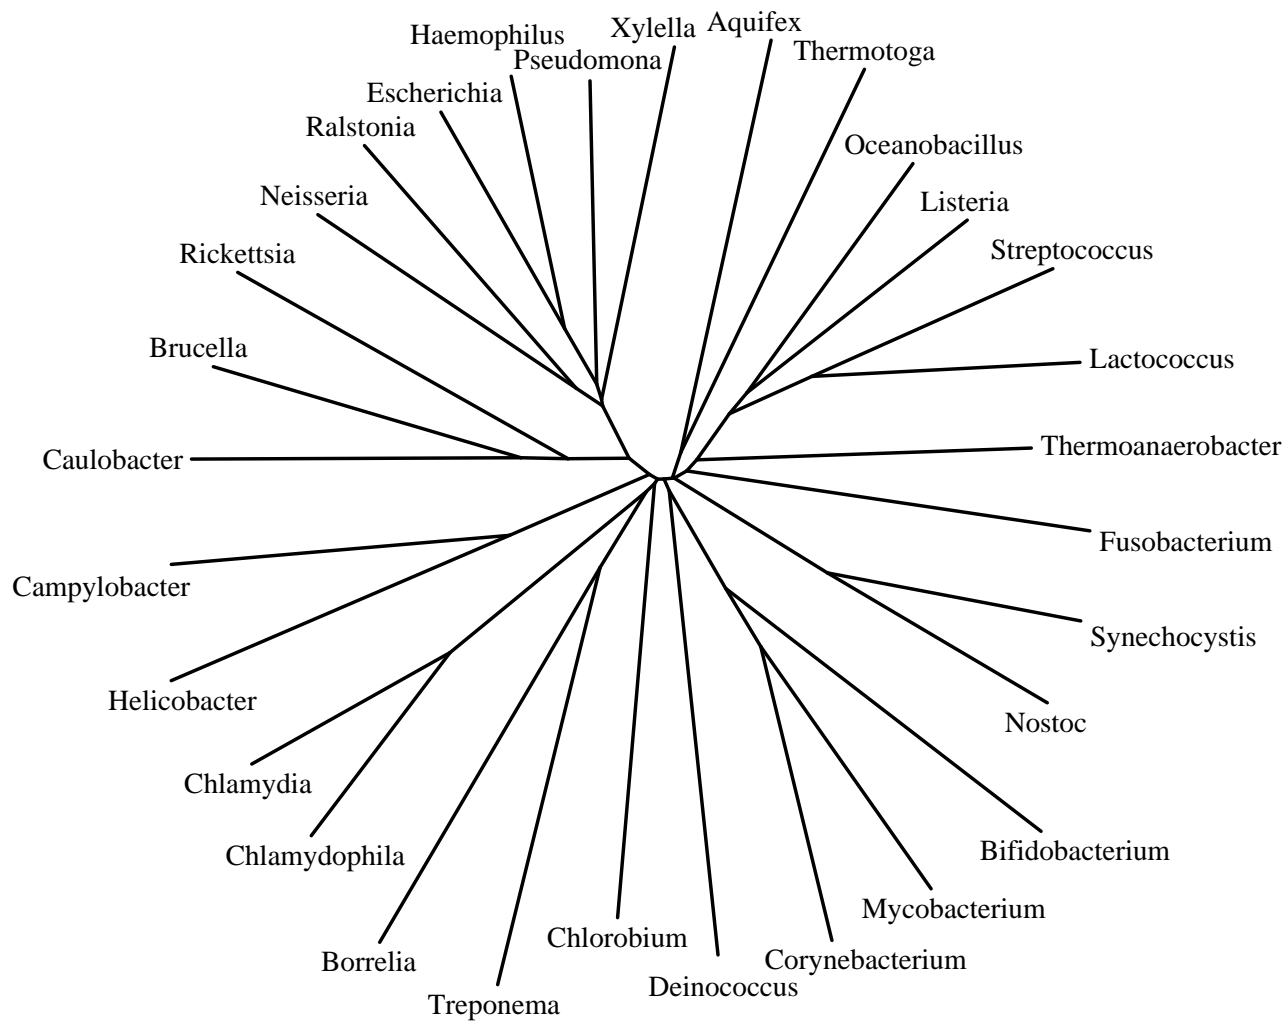

Figure S1: We computed a tree directly from a consensus distance matrix  $\{\mathbf{D}(i, j)\}$  to test how well the matrix conformed with a tree metric. The consensus distance matrix used for this figure was computed from 200 families of orthologous sequences of length 300. The tree was computed using the Fitch-Margoliash algorithm (program FITCH from the package PHYLIP), and gave an average percent standard deviation of 1.51%, meaning that a typical pairwise distance in the tree deviates by 1.51% from the distance in the matrix. The tree correctly reconstructs accepted clades such as Proteobacteria and Actinobacteria, but shows poor resolution in the center. The 30 organisms in the tree above were the 30 organisms used in the initial overall computation of the tree in Figure 1.

| Gene | Class | Name                                              | COG  | Rank | Coeff |
|------|-------|---------------------------------------------------|------|------|-------|
| Ffh  | N     | signal recognition particle protein               | 0541 | 51   | .88   |
| HflB | O     | cell division protein FtsH                        | 0465 | 0    | .91   |
| RplB | J     | ribosomal protein L2                              | 0090 | 18   | .87   |
| AspS | J     | aspartyl-tRNA synthetase, discriminating          | 0173 | 31   | .85   |
| -    | R     | conserved hypothetical protein                    | 0012 | 42   | .90   |
| Nth  | L     | endonuclease III                                  | 0177 | 113  | .86   |
| TufB | JE    | elongation factor TU                              | 0050 | 2    | .85   |
| QRI7 | O     | O-sialoglycoprotein endopeptidase, putative       | 0533 | 77   | .89   |
| LepA | N     | GTP-binding elongation factor family protein LepA | 0481 | 15   | .89   |
| InfB | J     | initiation factor 2                               | 0532 | 13   | .86   |
| FusA | J     | elongation factor G                               | 0480 | 12   | .77   |
| RpoC | K     | DNA-directed RNA polymerase, beta' subunit        | 0086 | 2    | .87   |
| RpsS | J     | ribosomal protein S19                             | 0185 | 34   | .83   |
| RpsB | J     | ribosomal protein S2                              | 0052 | 63   | .78   |

Table S1: Representative proteins used to root the bacterial tree of Figure 1. Sequence lengths in the first block are 180 and in the second block 60. The Rank column gives the conservation rank compared to other sequences of the same length; thus a 180-long sequence from elongation factor TU has rank 2 among 180-long sequences and a 60-long sequence from RNA polymerase, beta' subunit, has rank 2 among 60-long sequences.

| Gene | Class | Name                                                 | COG  | Rank | Coeff |
|------|-------|------------------------------------------------------|------|------|-------|
| PrfA | J     | peptide chain release factor 1                       | 0216 | 31   | .68   |
| Ffh  | N     | signal recognition particle protein                  | 0541 | 53   | .85   |
| GyrA | L     | DNA gyrase, subunit A                                | 0188 | 12   | .76   |
| InfB | J     | initiation factor 2                                  | 0532 | 27   | .81   |
| FusA | J     | elongation factor G                                  | 0480 | 15   | .70   |
| UvrB | L     | excinuclease ABC, subunit B                          | 0556 | 7    | .79   |
| RpoC | K     | DNA-directed RNA polymerase, beta' subunit           | 0086 | 0    | .67   |
| ClpX | O     | ATP-dependent Clp protease, ATP-binding subunit ClpX | 1219 | 13   | .76   |
| -    | R     | conserved hypothetical protein                       | 0012 | 38   | .73   |
| GroL | O     | groEL protein                                        | 0459 | 8    | .70   |
| SecA | N     | preprotein translocase, SecA subunit                 | 0653 | 54   | .64   |
| ThrS | J     | threonyl-tRNA synthetase                             | 0441 | 39   | .66   |
| SecY | N     | preprotein translocase, SecY subunit                 | 0201 | 92   | .66   |
| QRI7 | O     | O-sialoglycoprotein endopeptidase, putative          | 0533 | 84   | .81   |
| -    | R     | conserved hypothetical protein                       | 1160 | 116  | .82   |
| SerS | J     | seryl-tRNA synthetase                                | 0172 | 50   | .65   |
| DnaB | L     | replicative DNA helicase                             | 0305 | 86   | .70   |
| AlaS | J     | alanyl-tRNA synthetase                               | 0013 | 46   | .72   |
| RpoA | K     | DNA-directed RNA polymerase, alpha subunit           | 0202 | 106  | .72   |
| Lig  | L     | DNA ligase                                           | 0272 | 70   | .69   |
| Pnp  | J     | polynucleotide phosphorylase                         | 1185 | 23   | .65   |
| Obg  | R     | GTP-binding protein Obg                              | 0536 | 35   | .84   |
| FtsY | N     | signal recognition particle-docking protein FtsY     | 0552 | 71   | .82   |
| RecA | L     | recA protein                                         | 0468 | 6    | .63   |
| HflB | O     | cell division protein FtsH                           | 0465 | 2    | .79   |
| RplB | J     | ribosomal protein L2                                 | 0090 | 18   | .70   |
| DnaJ | O     | dnaJ protein                                         | 0484 | 84   | .80   |
| TufB | JE    | elongation factor TU                                 | 0050 | 4    | .70   |
| TatD | L     | conserved hypothetical protein                       | 0084 | 151  | .74   |
| RplE | J     | ribosomal protein L5                                 | 0094 | 32   | .82   |
| RplF | J     | ribosomal protein L6                                 | 0097 | 99   | .71   |
| Pth  | J     | peptidyl-tRNA hydrolase                              | 0193 | 161  | .72   |
| RplC | J     | ribosomal protein L3                                 | 0087 | 114  | .73   |
| Nth  | L     | endonuclease III                                     | 0177 | 149  | .71   |
| UvrC | L     | excinuclease ABC, subunit C                          | 0322 | 163  | .71   |
| MurA | M     | UDP-N-acetylglucosamine 1-carboxyvinyltransferase    | 0766 | 86   | .74   |
| RplP | J     | ribosomal protein L16                                | 0197 | 36   | .66   |
| RplM | J     | ribosomal protein L13                                | 0102 | 70   | .77   |
| RplK | J     | ribosomal protein L11                                | 0080 | 38   | .71   |
| RpsE | J     | ribosomal protein S5                                 | 0098 | 74   | .62   |

Table S2: Representative proteins used to compute the initial, overall tree for Figure 1. Sequence lengths within the first block are all 300, second block 240, third block 160, and fourth block 130. Correlation coefficients are lower than in the other lists, because of the number and diversity of organisms. It is possible that almost all proteins have been horizontally transferred at some point within the history of Bacteria; in this case representative proteins are the ones with the least obvious—and hence least misleading—transfers.

| Gene | Class | Name                                                 | COG  | Rank | Coeff |
|------|-------|------------------------------------------------------|------|------|-------|
| GyrA | L     | DNA gyrase, subunit A                                | 0188 | 13   | .88   |
| LepA | N     | GTP-binding elongation factor family protein LepA    | 0481 | 9    | .88   |
| DnaK | O     | dnaK protein                                         | 0443 | 7    | .87   |
| GuaA | F     | GMP synthase                                         | 0518 | 25   | .87   |
| RpoB | K     | DNA-directed RNA polymerase, beta subunit            | 0085 | 11   | .75   |
| GroL | O     | groEL protein                                        | 0459 | 8    | .85   |
| PrfA | J     | peptide chain release factor 1                       | 0216 | 52   | .88   |
| AspS | J     | aspartyl-tRNA synthetase, discriminating             | 0173 | 38   | .81   |
| Obg  | R     | GTP-binding protein Obg                              | 0536 | 51   | .90   |
| Eno  | G     | enolase                                              | 0148 | 15   | .74   |
| UvrB | L     | excinuclease ABC, subunit B                          | 0556 | 5    | .72   |
| DnaB | L     | replicative DNA helicase                             | 0305 | 105  | .88   |
| UvrA | L     | excinuclease ABC, subunit A                          | 0178 | 3    | .75   |
| RpoC | K     | DNA-directed RNA polymerase, beta' subunit           | 0086 | 0    | .70   |
| ClpX | O     | ATP-dependent Clp protease, ATP-binding subunit ClpX | 1219 | 10   | .79   |
| FtsZ | D     | cell division protein FtsZ                           | 0206 | 40   | .73   |
| HflB | O     | cell division protein FtsH                           | 0465 | 4    | .91   |
| InfB | J     | initiation factor 2                                  | 0532 | 26   | .84   |
| PrsA | FE    | ribose-phosphate pyrophosphokinase                   | 0462 | 53   | .88   |
| QRI7 | O     | O-sialoglycoprotein endopeptidase, putative          | 0533 | 99   | .87   |
| LysU | J     | lysyl-tRNA synthetase                                | 1190 | 35   | .82   |
| Sms  | O     | DNA repair protein                                   | 1066 | 78   | .81   |
| HflX | R     | GTP-binding protein HflX                             | 2262 | 104  | .75   |
| GpsA | C     | glycerol-3-phosphate dehydrogenase, NAD(+)-dependent | 0240 | 137  | .81   |
| TufB | JE    | elongation factor TU                                 | 0050 | 1    | .71   |
| SerS | J     | seryl-tRNA synthetase                                | 0172 | 30   | .79   |
| RpoA | K     | DNA-directed RNA polymerase, alpha subunit           | 0202 | 110  | .76   |
| DnaJ | O     | dnaJ protein                                         | 0484 | 102  | .78   |
| -    | R     | conserved hypothetical protein                       | 0012 | 59   | .74   |
| AlaS | J     | alanyl-tRNA synthetase                               | 0013 | 73   | .80   |

Table S3: Representative proteins used to compute the left half of the tree in Figure 1. Lengths were all 300.

| Gene | Class | Name                                                 | COG  | Rank | Coeff |
|------|-------|------------------------------------------------------|------|------|-------|
| Ffh  | N     | signal recognition particle protein                  | 0541 | 65   | .95   |
| -    | R     | GTP-binding protein, YchF family                     | 0012 | 42   | .94   |
| Obg  | R     | GTP-binding protein CgtA                             | 0536 | 67   | .90   |
| InfB | J     | translation initiation factor IF-2                   | 0532 | 32   | .91   |
| Exo  | L     | DNA polymerase I                                     | 0258 | 60   | .91   |
| LepA | N     | GTP-binding protein LepA                             | 0481 | 17   | .92   |
| GyrB | L     | DNA gyrase subunit B                                 | 0187 | 18   | .95   |
| Pnp  | J     | polyribonucleotide nucleotidyltransferase            | 1185 | 20   | .83   |
| GidA | D     | glucose inhibited division protein A                 | 0445 | 21   | .92   |
| RuvB | L     | Holliday junction DNA helicase RuvB                  | 2255 | 23   | .94   |
| UvrB | L     | excinuclease ABC, subunit B                          | 0556 | 14   | .95   |
| PyrG | F     | CTP synthase                                         | 0504 | 29   | .89   |
| LeuS | J     | leucyl-tRNA synthetase                               | 0495 | 37   | .89   |
| ClpX | O     | ATP-dependent Clp protease, ATP-binding subunit ClpX | 1219 | 15   | .89   |
| Rho  | K     | transcription termination factor Rho                 | 1158 | 4    | .91   |
| HflB | O     | cell division protein FtsH                           | 0465 | 2    | .86   |
| GyrA | L     | DNA gyrase subunit A                                 | 0188 | 10   | .88   |
| RecA | L     | recA protein                                         | 0468 | 6    | .86   |
| -    | R     | GTP-binding protein                                  | 1160 | 147  | .92   |
| QRI7 | O     | peptidase M22 family protein                         | 0533 | 108  | .91   |
| RpsA | J     | ribosomal protein S1                                 | 0539 | 35   | .88   |
| SecY | N     | preprotein translocase SecY subunit                  | 0201 | 75   | .83   |
| RpoC | K     | DNA-directed RNA polymerase, beta' subunit           | 0086 | 1    | .89   |
| GroL | O     | chaperonin, 60 kDa                                   | 0459 | 8    | .90   |
| TufB | JE    | translation elongation factor EF-Tu                  | 0050 | 0    | .85   |
| AlaS | J     | alanyl-tRNA synthetase                               | 0013 | 27   | .82   |
| SerS | J     | seryl-tRNA synthetase                                | 0172 | 54   | .79   |
| Uup  | R     | ABC transporter, ATP-binding protein                 | 0488 | 81   | .87   |
| Fmt  | J     | methionyl-tRNA formyltransferase                     | 0223 | 120  | .89   |
| DnaG | L     | DNA primase                                          | 0358 | 121  | .90   |
| RpoA | K     | DNA-directed RNA polymerase, alpha subunit           | 0202 | 126  | .91   |

Table S4: Representative proteins used to compute the right half of the tree in Figure 1. Lengths were all 300.

| Gene | Class | COG  | Name                              | Pair of Taxa                               |
|------|-------|------|-----------------------------------|--------------------------------------------|
| DnaA | L     | 0593 | Chromosomal replication initiator | Actinobacteria - Firmicutes                |
| RplD | J     | 0088 | Ribosomal protein L4              | Actinobacteria - Firmicutes                |
| RplO | J     | 0200 | Ribosomal protein L15             | Actinobacteria - Firmicutes                |
| MetG | J     | 0143 | Methionyl-tRNA synthetase         | Cyanobacteria - Firmicutes                 |
| SdhA | C     | 1053 | Succinate dehydrogenase           | Cyanobacteria - Proteobacteria             |
| IivD | EG    | 0129 | Dihydroxy-acid dehydratase        | Cyanobacteria - Proteobacteria             |
| AvtA | E     | 0436 | Aspartate aminotransferase        | Cyanobacteria - Proteobacteria             |
| TrmU | J     | 0482 | tRNA methyltransferase            | Lactobacillales - $\gamma$ -Proteobacteria |
| Uup  | R     | 0488 | ABC transporter, EF-3 family      | Actinobacteria - Proteobacteria            |
| IleS | J     | 0060 | Isoleucyl-tRNA synthetase         | Actinobacteria - Rickettsiales             |
| RpsN | J     | 0199 | Ribosomal protein S14             | Actinobacteria - Proteobacteria            |
| FtsK | D     | 1674 | Cell division protein FtsK        | Spirochaetes - $\epsilon$ -Proteobacteria  |
| Ndk  | F     | 0105 | Nucleoside diphosphate kinase     | Chlamydiales - Proteobacteria              |

Table S5: Some proteins with anomalously small evolutionary distances between distant taxa, presumably due to horizontal transfer between ancestors. Notice that even “informational” proteins such as ribosomal proteins and tRNA synthetases are subject to horizontal transfer. Class refers to the COG (clusters of orthologous groups) functional codes given in Table S6.

|   |                                                              |
|---|--------------------------------------------------------------|
|   | <b>Information storage and processing</b>                    |
| J | Translation, ribosomal structure and biogenesis              |
| K | Transcription                                                |
| L | DNA replication, recombination and repair                    |
|   | <b>Cellular processes</b>                                    |
| D | Cell division and chromosome partitioning                    |
| O | Posttranslational modification, protein turnover, chaperones |
| M | Cell envelope biogenesis, outer membrane                     |
| N | Cell motility and secretion                                  |
| P | Inorganic ion transport and metabolism                       |
| T | Signal transduction mechanisms                               |
|   | <b>Metabolism</b>                                            |
| C | Energy production and conversion                             |
| G | Carbohydrate transport and metabolism                        |
| E | Amino acid transport and metabolism                          |
| F | Nucleotide transport and metabolism                          |
| H | Coenzyme metabolism                                          |
| I | Lipid metabolism                                             |
| Q | Secondary metabolites biosynthesis, transport and catabolism |
|   | <b>Poorly characterized</b>                                  |
| R | General function prediction only                             |
| S | Function unknown                                             |

Table S6: Functional categories of COGs.
